# Supplementary material for: Sociodemographic, Lifestyle, Environmental and Pregnancy-Related Determinants of Dietary Patterns during Pregnancy
Source: MDPI journal article supplement (doi:10.3390/ijerph16050754), 2019-03-02
Supplement: s1 [file s1]

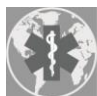

# Supplementary Materials: Sociodemographic, Lifestyle, Environmental and Pregnancy-Related Determinants of Dietary Patterns during Pregnancy

Table S1. Characteristics of the study population (N = 1306).

| Variables                                                 | Category    | N (%)       |
|-----------------------------------------------------------|-------------|-------------|
| <b>Sociodemographic</b>                                   |             |             |
| Maternal age (years)                                      | 17-30       | 837 (64.1)  |
|                                                           | >30         | 446 (34.2)  |
|                                                           | No data     | 23 (1.8)    |
| Marital status                                            | Married     | 1045 (80.0) |
|                                                           | Unmarried   | 250 (19.1)  |
|                                                           | No data     | 11 (0.8)    |
| Maternal education (years of education)                   | ≤9          | 30 (2.3)    |
|                                                           | 10-12       | 361 (27.6)  |
|                                                           | >12         | 904 (69.2)  |
|                                                           | No data     | 11 (0.8)    |
| Occupational activity between 8th-12th weeks of pregnancy | No          | 511 (39.1)  |
|                                                           | Yes         | 724 (55.4)  |
|                                                           | No data     | 71 (5.4)    |
| Socio-economic status                                     | Low         | 95 (7.3)    |
|                                                           | Medium      | 867 (66.4)  |
|                                                           | High        | 315 (24.1)  |
|                                                           | No data     | 29 (2.2)    |
| <b>Lifestyle/health behavior</b>                          |             |             |
| Pre-pregnancy BMI (kg/m <sup>2</sup> )                    | <18.5       | 114 (8.7)   |
|                                                           | 18.5-24.99  | 933 (71.4)  |
|                                                           | ≥25         | 239 (18.3)  |
|                                                           | No data     | 20 (1.5)    |
| Cotinine level                                            | ≤10ng/ml    | 1158 (88.7) |
|                                                           | >10ng/ml    | 145 (11.1)  |
|                                                           | No data     | 3 (0.2)     |
| Alcohol consumption                                       | No          | 1207 (92.4) |
|                                                           | Yes         | 83 (6.4)    |
|                                                           | No data     | 16 (1.2)    |
| Physical activity                                         | No          | 406 (31.1)  |
|                                                           | Yes         | 897 (68.7)  |
|                                                           | No data     | 3 (0.2)     |
| Perceived Stress Scale (range 0-38 points)                | <17 points  | 615 (47.1)  |
|                                                           | ≥ 17 points | 682 (52.2)  |
|                                                           | No data     | 9 (0.7)     |
| <b>Environmental</b>                                      |             |             |
| Place of residence (thousands of inhabitants)             | <10         | 268 (20.5)  |

|                                                                    |                    |             |
|--------------------------------------------------------------------|--------------------|-------------|
|                                                                    | 10-100             | 194 (14.9)  |
|                                                                    | 100-500            | 352 (27.0)  |
|                                                                    | >500               | 490 (37.5)  |
|                                                                    | No data            | 2 (0.2)     |
| <b>Season</b>                                                      |                    |             |
|                                                                    | December-February  | 312 (23.9)  |
|                                                                    | March-May          | 326 (25.0)  |
|                                                                    | June-August        | 269 (20.6)  |
|                                                                    | September-November | 256 (19.6)  |
|                                                                    | No data            | 143 (10.9)  |
| <b>Pregnancy-related</b>                                           |                    |             |
| <b>Parity</b>                                                      |                    |             |
|                                                                    | 0                  | 675 (51.7)  |
|                                                                    | ≥1                 | 624 (47.8)  |
|                                                                    | No data            | 7 (0.5)     |
| <b>Pregnancy symptoms and complications</b>                        |                    |             |
|                                                                    | No                 | 1261 (96.6) |
|                                                                    | Yes                | 45 (3.4)    |
| <b>Week of pregnancy for the 1<sup>st</sup> medical-care visit</b> |                    |             |
|                                                                    | ≤6                 | 779 (59.6)  |
|                                                                    | >6                 | 506 (38.7)  |
|                                                                    | No data            | 21 (1.6)    |
| <b>Sex of the child</b>                                            |                    |             |
|                                                                    | Male               | 582 (44.6)  |
|                                                                    | Female             | 568 (43.5)  |
|                                                                    | No data            | 156 (11.9)  |

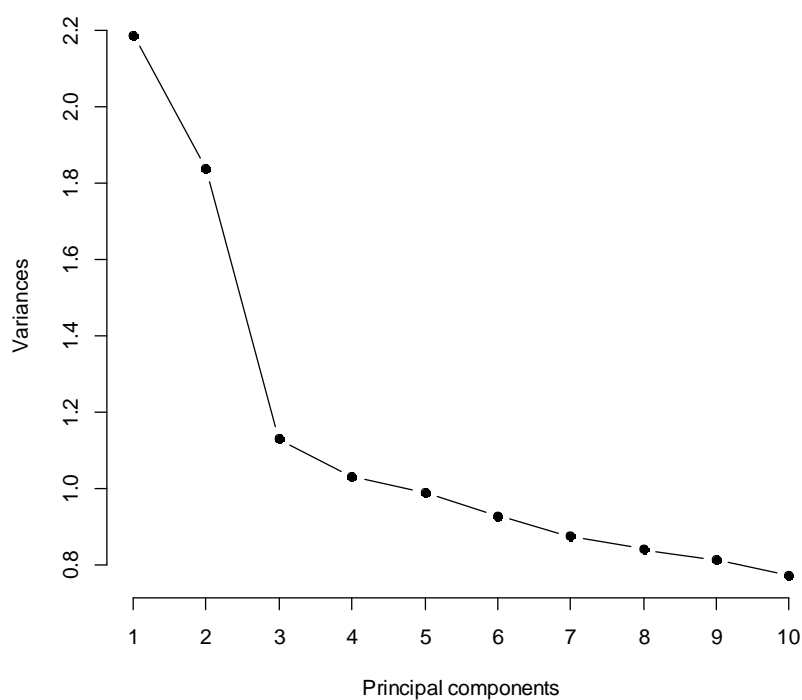

**Figure S1.** Scree plot of 10 largest principal components for grouped FFQ scores, indicating that the first two components capture much more of the variance than any of the remaining ones. .

**Table S2.** Frequency of the consumption of grouped food products.

| Food Groups    | Never      | Less Than Once Per Month | 1-3 Times Per Month<br>n (%) | 1-3 Times Per Week | 4-6 Times Per Week | Everyday   |
|----------------|------------|--------------------------|------------------------------|--------------------|--------------------|------------|
| Refined grains | 1 (0.1)    | 1 (0.1)                  | 17 (1.3)                     | 323 (24.7)         | 932 (71.4)         | 32 (2.5)   |
| Whole grains   | 59 (4.5)   | 55 (4.2)                 | 270 (20.7)                   | 528 (40.4)         | 362 (27.7)         | 32 (2.5)   |
| Low-fat dairy  | 1 (0.1)    | 0 (0)                    | 19 (1.5)                     | 403 (30.9)         | 807 (61.8)         | 76 (5.8)   |
| High-fat dairy | 62 (4.7)   | 18 (1.4)                 | 141 (10.8)                   | 623 (47.7)         | 308 (23.6)         | 154 (11.8) |
| Butter         | 35 (2.7)   | 8 (0.6)                  | 22 (1.7)                     | 144 (11)           | 500 (38.3)         | 597 (45.7) |
| Red meat       | 73 (5.6)   | 45 (3.4)                 | 288 (22.1)                   | 676 (51.8)         | 204 (15.6)         | 20 (1.5)   |
| Poultry        | 41 (3.1)   | 9 (0.7)                  | 180 (13.8)                   | 859 (65.8)         | 197 (15.1)         | 20 (1.5)   |
| Processed meat | 47 (3.6)   | 16 (1.2)                 | 54 (4.1)                     | 383 (29.3)         | 445 (34.1)         | 361 (27.6) |
| Fish/Seafood   | 70 (5.4)   | 126 (9.6)                | 670 (51.3)                   | 421 (32.2)         | 18 (1.4)           | 1 (0.1)    |
| Fruits         | 0 (0)      | 0 (0)                    | 7 (0.5)                      | 482 (36.9)         | 774 (59.3)         | 43 (3.3)   |
| Vegetables     | 3 (0.2)    | 1 (0.1)                  | 25 (1.9)                     | 611 (46.8)         | 650 (49.8)         | 16 (1.2)   |
| Potatoes       | 15 (1.1)   | 15 (1.1)                 | 97 (7.4)                     | 606 (46.4)         | 438 (33.5)         | 135 (10.3) |
| Legumes        | 193 (14.8) | 152 (11.6)               | 467 (35.8)                   | 374 (28.6)         | 113 (8.7)          | 7 (0.5)    |
| Sweets         | 45 (3.4)   | 42 (3.2)                 | 260 (19.9)                   | 656 (50.2)         | 258 (19.8)         | 45 (3.4)   |

**Table S3.** Seasonality of the consumption of grouped food products.

| Food Groups    | <i>p</i>     |
|----------------|--------------|
| Refined grains | 0.56         |
| Whole grains   | 0.21         |
| Low-fat dairy  | 0.49         |
| High-fat dairy | 0.99         |
| Butter         | 0.75         |
| Red meat       | 0.51         |
| Poultry        | 0.84         |
| Processed meat | 0.47         |
| Fish/Seafood   | 0.35         |
| Fruits         | <b>0.001</b> |
| Vegetables     | <b>0.006</b> |
| Potatoes       | 0.41         |
| Legumes        | 0.97         |
| Sweets         | 0.73         |

**Table S4.** Sociodemographic, lifestyle, environmental and pregnancy-related determinants of dietary pattern scores during pregnancy\* – multivariate logistic regression model (n = 958).

| Variables                                                        | Western            |          | Prudent           |              | Prudent -Western  |              |
|------------------------------------------------------------------|--------------------|----------|-------------------|--------------|-------------------|--------------|
|                                                                  | OR (95%CI)         | <i>p</i> | OR (95%CI)        | <i>p</i>     | OR (95%CI)        | <i>p</i>     |
| <b>Sociodemographic</b>                                          |                    |          |                   |              |                   |              |
| <b>Maternal age at delivery (years)</b>                          |                    |          |                   |              |                   |              |
| 17-30                                                            | Ref.               |          | Ref.              |              | Ref.              |              |
| >30                                                              | 1.00 (0.74, 1.36)  | 0.99     | 1.54 (1.13, 2.10) | <b>0.006</b> | 1.39 (1.02, 1.89) | <b>0.04</b>  |
| <b>Marital status</b>                                            |                    |          |                   |              |                   |              |
| Married                                                          | Ref.               |          | Ref.              |              | Ref.              |              |
| Unmarried                                                        | 1.19 (0.82, 1.72)  | 0.37     | 0.83 (0.57, 1.21) | 0.34         | 0.70 (0.48, 1.02) | 0.06         |
| <b>Maternal education (years of education)</b>                   |                    |          |                   |              |                   |              |
| 10-12                                                            | Ref.               |          | Ref.              |              | Ref.              |              |
| ≤9                                                               | 2.68 (0.84, 10.36) | 0.11     | 0.74 (0.19, 2.41) | 0.63         | 0.64 (0.16, 2.05) | 0.47         |
| >12                                                              | 0.91 (0.67, 1.25)  | 0.57     | 1.60 (1.16, 2.21) | <b>0.004</b> | 1.59 (1.15, 2.20) | <b>0.005</b> |
| <b>Occupational activity between 8th-12th weeks of pregnancy</b> |                    |          |                   |              |                   |              |
| No                                                               | Ref.               |          | Ref.              |              | Ref.              |              |
| Yes                                                              | 0.86 (0.65, 1.14)  | 0.29     | 0.84 (0.63, 1.11) | 0.22         | 0.98 (0.74, 1.30) | 0.91         |
| <b>Socio – economic status</b>                                   |                    |          |                   |              |                   |              |
| Medium                                                           | Ref.               |          | Ref.              |              | Ref.              |              |
| Low                                                              | 0.70 (0.41, 1.21)  | 0.21     | 0.47 (0.26, 0.83) | <b>0.011</b> | 0.90 (0.51, 1.57) | 0.71         |
| High                                                             | 0.92 (0.67, 1.26)  | 0.60     | 1.54 (1.12, 2.12) | <b>0.008</b> | 1.34 (0.98, 1.84) | 0.07         |
| <b>Lifestyle/health behavior</b>                                 |                    |          |                   |              |                   |              |
| <b>Pre-pregnancy BMI</b>                                         |                    |          |                   |              |                   |              |
| 18.5-24.99                                                       | Ref.               |          | Ref.              |              | Ref.              |              |
| <18.5                                                            | 1.16 (0.72, 1.91)  | 0.54     | 0.68 (0.41, 1.11) | 0.12         | 0.84 (0.51, 1.38) | 0.49         |

|                                                           |                   |             |                   |             |                   |              |
|-----------------------------------------------------------|-------------------|-------------|-------------------|-------------|-------------------|--------------|
| ≥25                                                       | 0.65 (0.46, 0.92) | <b>0.02</b> | 1.13 (0.79, 1.61) | 0.50        | 1.57 (1.11, 2.24) | <b>0.01</b>  |
| <b>Cotinine level</b>                                     |                   |             |                   |             |                   |              |
| ≤10ng/ml                                                  | Ref.              |             | Ref.              |             | Ref.              |              |
| >10ng/ml                                                  | 1.55 (1.00, 2.45) | <b>0.05</b> | 0.92 (0.59, 1.46) | 0.74        | 0.79 (0.50, 1.23) | 0.29         |
|                                                           |                   | <b>4</b>    |                   |             |                   |              |
| <b>Alcohol consumption</b>                                |                   |             |                   |             |                   |              |
| No                                                        | Ref.              |             | Ref.              |             | Ref.              |              |
| Yes                                                       | 1.78 (1.05, 3.05) | <b>0.03</b> | 1.08 (0.63, 1.83) | 0.78        | 0.65 (0.38, 1.10) | 0.11         |
| <b>Physical activity</b>                                  |                   |             |                   |             |                   |              |
| No                                                        | Ref.              |             | Ref.              |             | Ref.              |              |
| Yes                                                       | 0.82 (0.61, 1.09) | 0.17        | 1.30 (0.97, 1.73) | 0.08        | 1.50 (1.12, 2.00) | <b>0.007</b> |
| <b>Perceived Stress Scale (range0-38)</b>                 |                   |             |                   |             |                   |              |
| <17                                                       | Ref.              |             | Ref.              |             | Ref.              |              |
| ≥ 17                                                      | 0.91 (0.69, 1.19) | 0.47        | 0.83 (0.63, 1.10) | 0.19        | 0.88 (0.67, 1.15) | 0.34         |
| <b>Environmental</b>                                      |                   |             |                   |             |                   |              |
| <b>Place of residence (thousands of inhabitants)</b>      |                   |             |                   |             |                   |              |
| >500                                                      | 1.21 (0.83, 1.77) | 0.32        | 0.64 (0.44, 0.95) | <b>0.03</b> | 0.74 (0.50, 1.08) | 0.12         |
| <10                                                       |                   |             |                   |             |                   |              |
| 10-100                                                    | 1.24 (0.82, 1.89) | 0.31        | 0.94 (0.61, 1.43) | 0.76        | 0.96 (0.63, 1.46) | 0.84         |
| 100-500                                                   | 1.12 (0.80, 1.57) | 0.52        | 1.10 (0.78, 1.54) | 0.59        | 1.12 (0.80, 1.57) | 0.52         |
| <b>Season</b>                                             |                   |             |                   |             |                   |              |
| December-February                                         | Ref.              |             | Ref.              |             | Ref.              |              |
| March-May                                                 | 1.03 (0.72, 1.46) | 0.89        | 1.24 (0.87, 1.77) | 0.24        | 0.77 (0.54, 1.10) | 0.15         |
| June-August                                               | 0.67 (0.46, 0.98) | <b>0.04</b> | 1.37 (0.93, 2.02) | 0.11        | 1.16 (0.79, 1.70) | 0.44         |
| September-November                                        | 0.71 (0.49, 1.04) | 0.08        | 0.96 (0.65, 1.40) | 0.83        | 1.02 (0.70, 1.50) | 0.89         |
| <b>Pregnancy-related</b>                                  |                   |             |                   |             |                   |              |
| <b>Parity</b>                                             |                   |             |                   |             |                   |              |
| 0                                                         | Ref.              |             | Ref.              |             | Ref.              |              |
| ≥1                                                        | 1.54 (1.15, 2.08) | <b>0.00</b> | 1.20 (0.89, 1.62) | 0.23        | 0.64 (0.47, 0.87) | <b>0.004</b> |
|                                                           |                   | <b>4</b>    |                   |             |                   |              |
| <b>Pregnancy symptoms and complications</b>               |                   |             |                   |             |                   |              |
| No                                                        | 1.67 (0.80, 3.63) | 0.18        | 1.67 (0.78, 3.74) | 0.19        | 1.47 (0.70, 3.16) | 0.31         |
| Yes                                                       |                   |             |                   |             |                   |              |
| <b>Week of pregnancy for the first medical care visit</b> |                   |             |                   |             |                   |              |
| ≤6                                                        | 1.00 (0.76, 1.31) | 0.99        | 1.07 (0.81, 1.41) | 0.64        | 1.09 (0.83, 1.44) | 0.53         |
| >6                                                        |                   |             |                   |             |                   |              |
| <b>Sex of the child</b>                                   |                   |             |                   |             |                   |              |
| Male                                                      | Ref.              |             | Ref.              |             | Ref.              |              |
| Female                                                    | 0.96 (0.74, 1.25) | 0.77        | 0.79 (0.61, 1.04) | 0.09        | 1.01 (0.77, 1.32) | 0.95         |

\*Logistic regression modeling for Western dietary pattern, Prudent dietary pattern and their scores' difference: Prudent pattern score minus Western pattern score being over their respective median values. OR – odds ratio. 95%CI – 95% confidence interval. Ref. – reference group.
